# Supplementary material
Source: PubMed Central journal article supplement (PMC2605734)
Supplement: NIHMS79539-supplement-01.pdf [file NIHMS79539-supplement-01.pdf]

A

% of embryos with abnormal nuclei divisions during syncytial blastoderm.

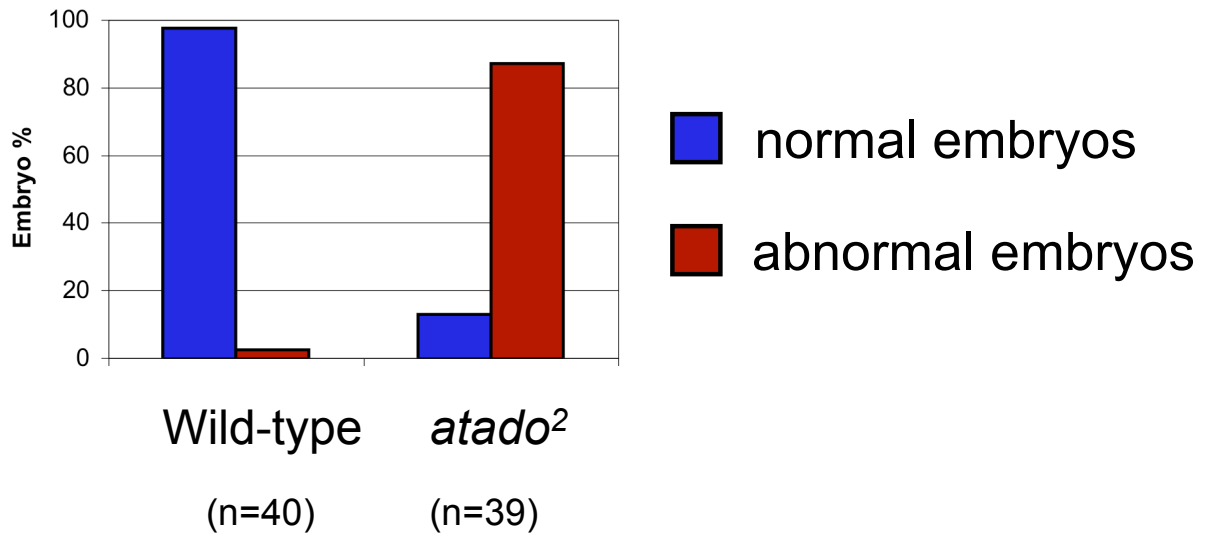

B

% of nuclei with chromosome bridges during interphase.

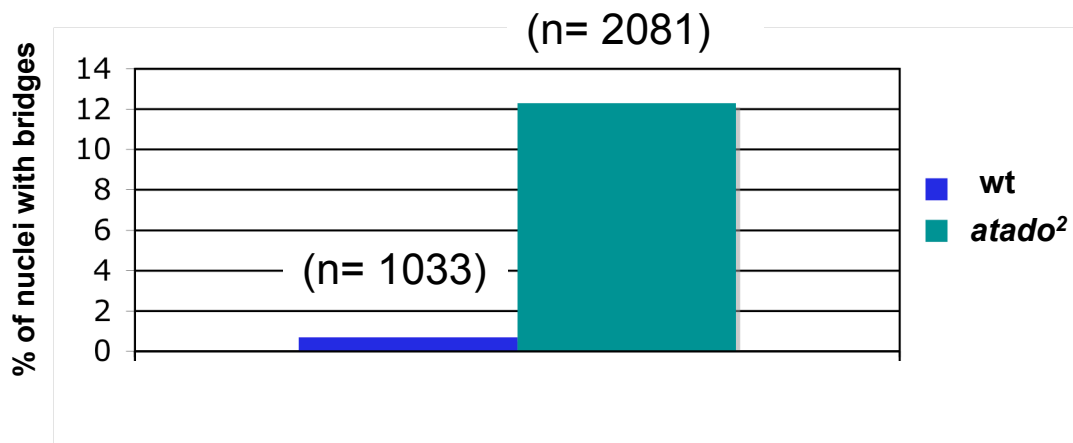

Chromosome bridges in 12.3%±21 of the nuclei mutant for *atado* and only 0.7%±1.8 of the control nuclei (Student's t test, 95% confidence interval, p<0.03).

Sup. Fig. 1
