# Supplementary material
Source: PubMed Central journal article supplement (PMC2605734)

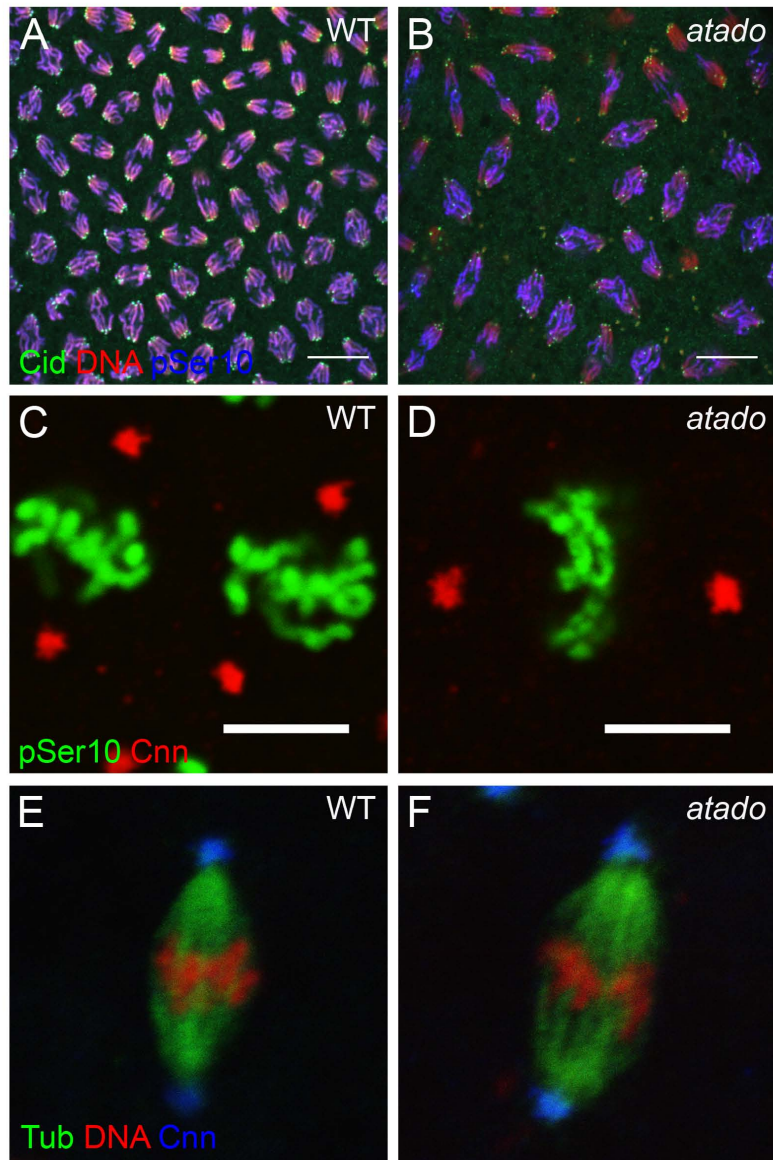

Sup. Fig. 2

Supplement: NIHMS79539-supplement-02.pdf [file NIHMS79539-supplement-02.pdf]

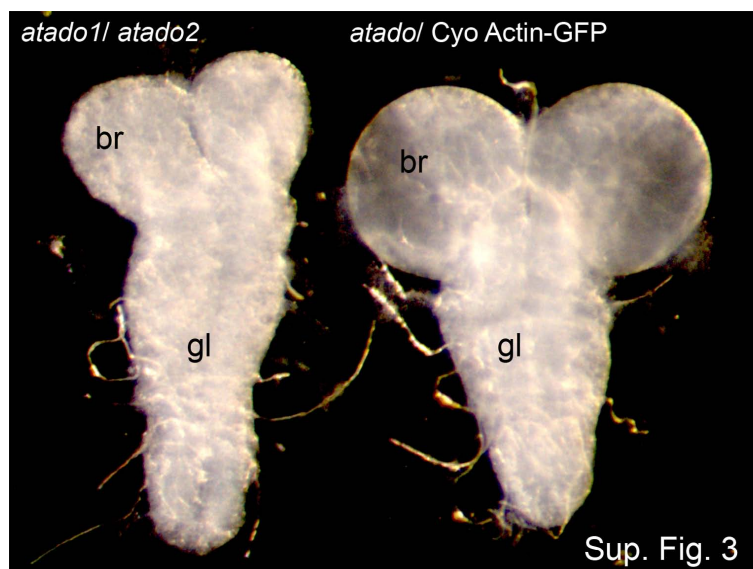

Supplement: NIHMS79539-supplement-03.pdf [file NIHMS79539-supplement-03.pdf]

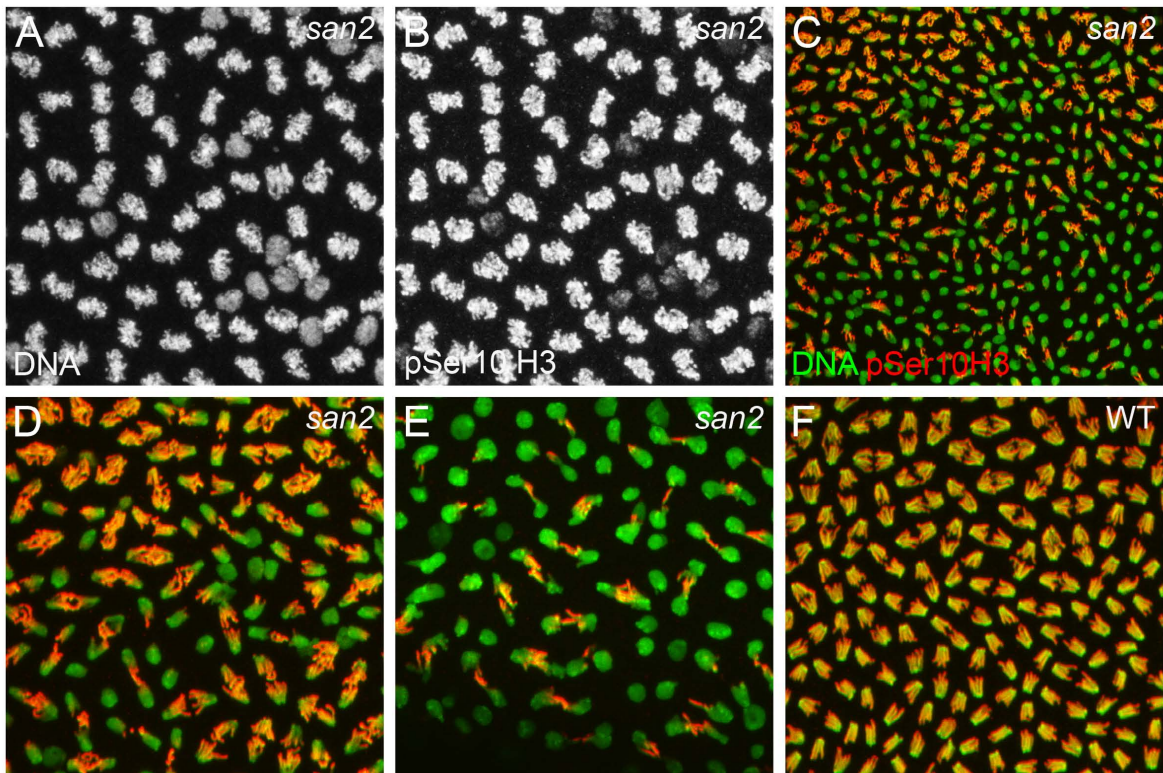

Sup. Figure 4

Supplement: NIHMS79539-supplement-04.pdf [file NIHMS79539-supplement-04.pdf]

A

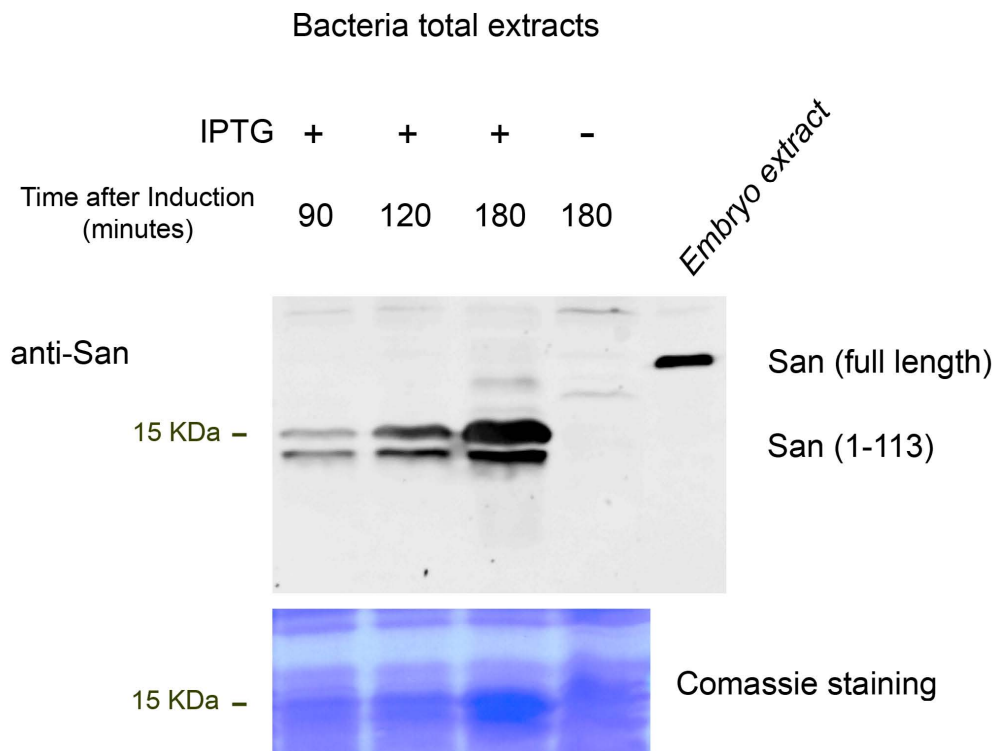

Sup. Fig. 5

Supplement: NIHMS79539-supplement-05.pdf [file NIHMS79539-supplement-05.pdf]

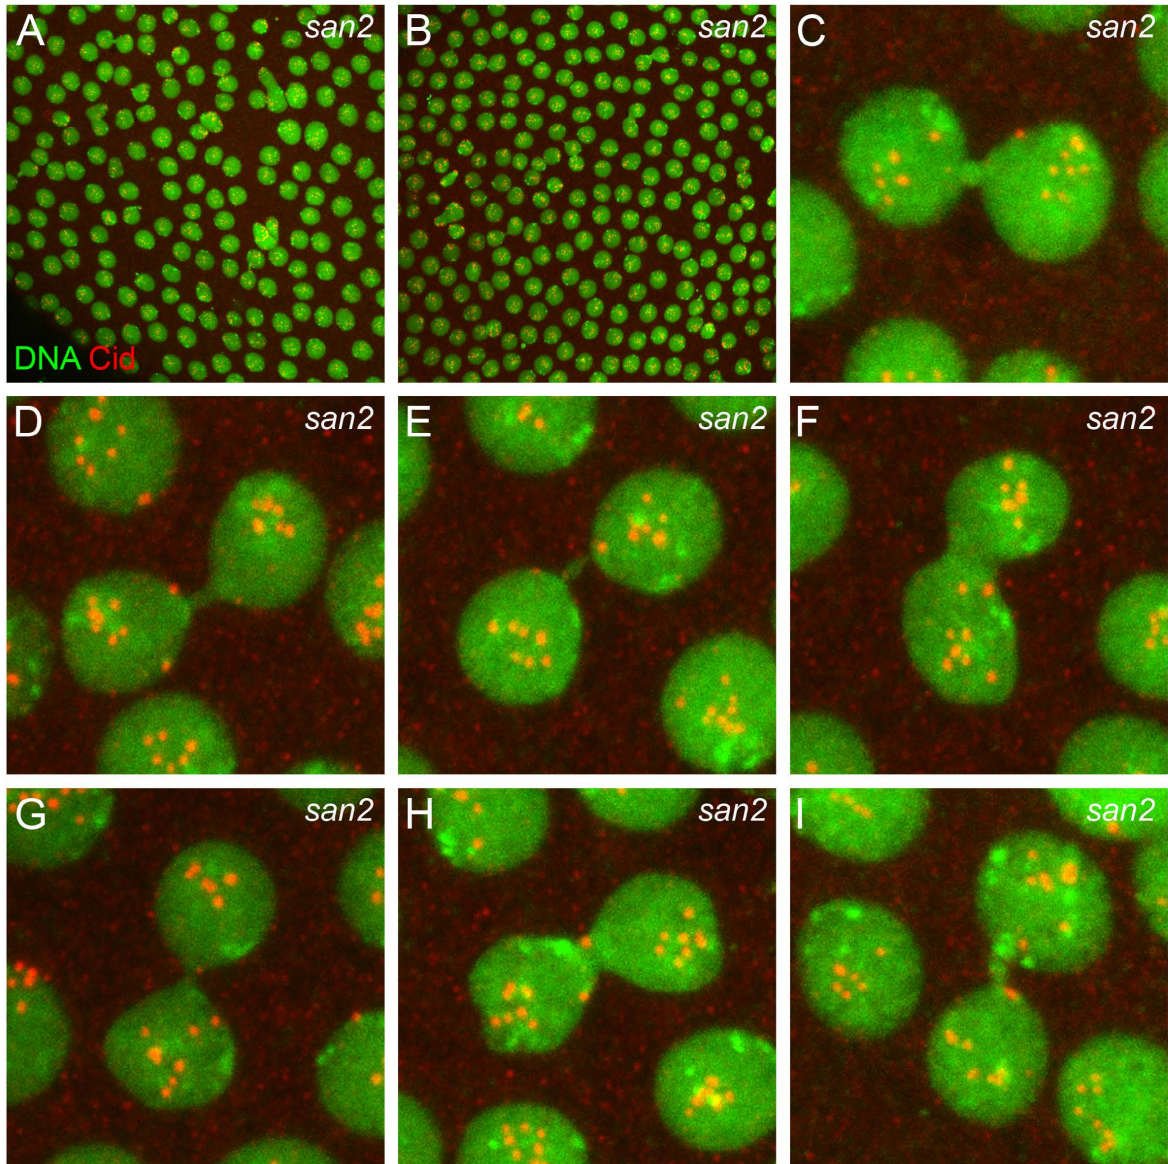

Sup. Fig. 6

Supplement: NIHMS79539-supplement-06.pdf [file NIHMS79539-supplement-06.pdf]

*san* is not required for egg laying.

Egg laying quantification (number of eggs/ female)

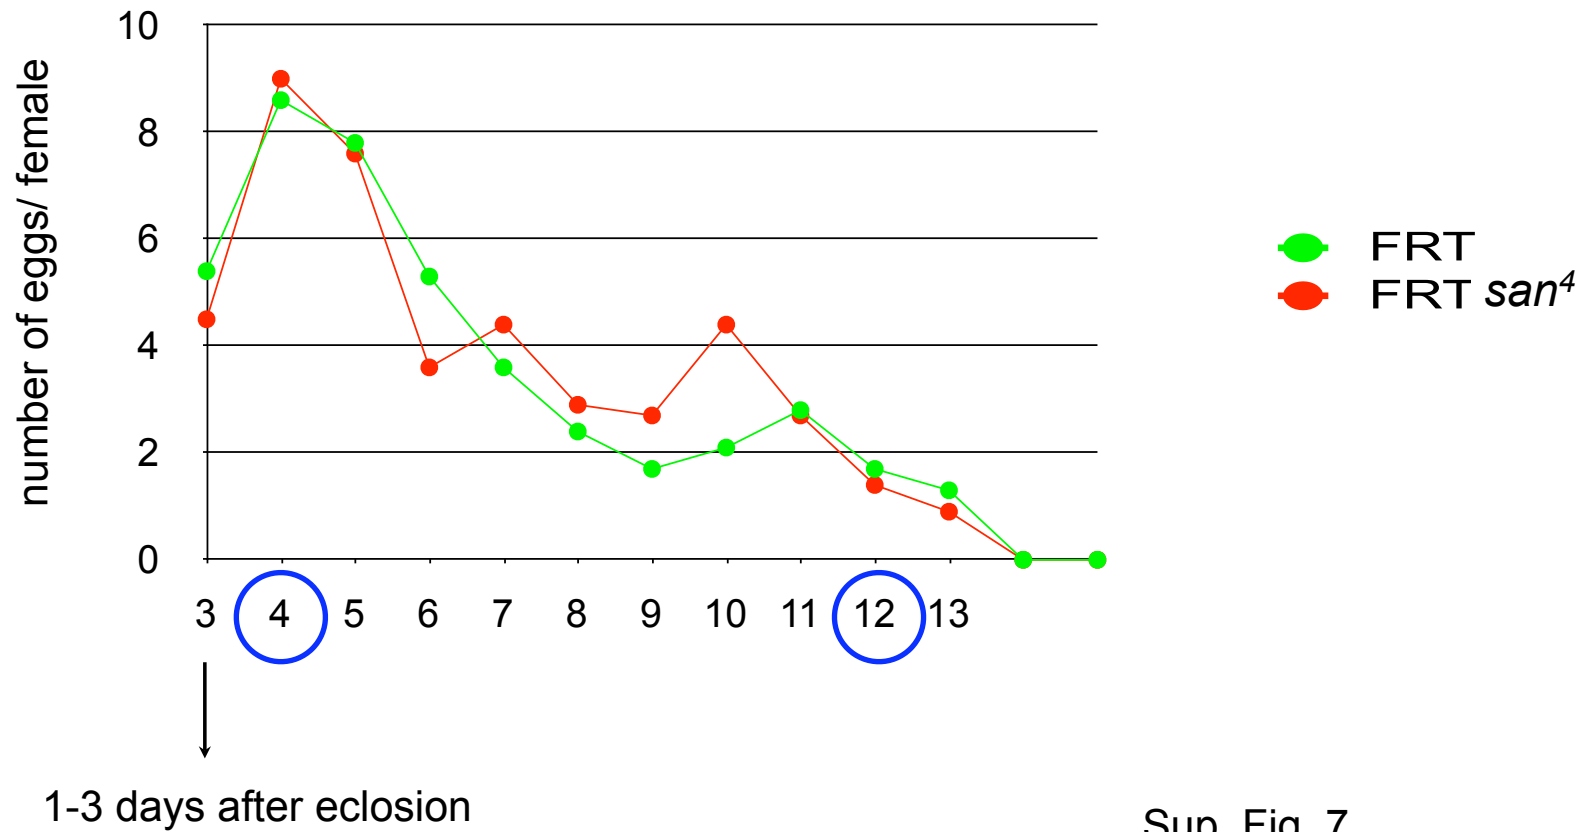

Sup. Fig. 7

Supplement: NIHMS79539-supplement-07.pdf [file NIHMS79539-supplement-07.pdf]

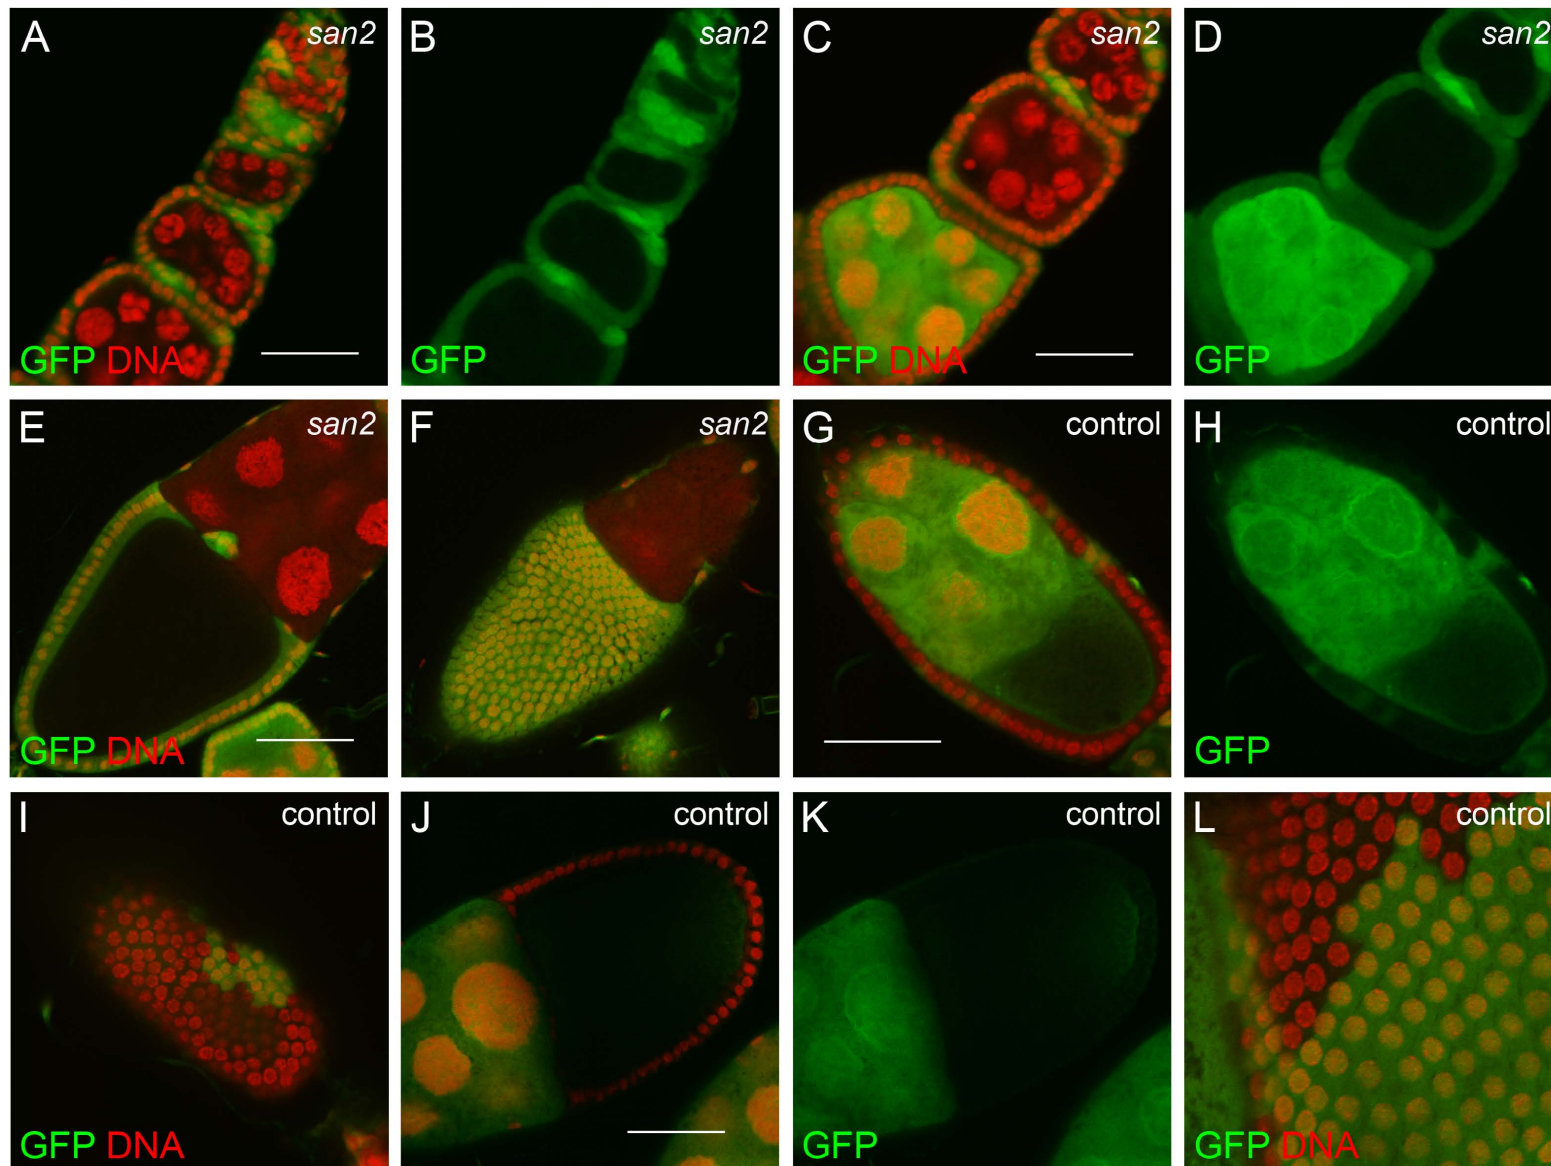

Sup. Fig. 8

Supplement: NIHMS79539-supplement-08.pdf [file NIHMS79539-supplement-08.pdf]
